# Supplementary material for: In vivo NMDA receptor function in people with NMDA receptor antibody encephalitis
Source: bioRxiv or medRxiv preprint supplement (doi:10.1101/2021.12.04.21267226), 2021-12-05
Supplement: Supplementary file [file media-1.pdf]

## NEST Investigators consortium

| <b>Author</b>                 | <b>Affiliations</b>                                                                                                                                                                                                                                                  |
|-------------------------------|----------------------------------------------------------------------------------------------------------------------------------------------------------------------------------------------------------------------------------------------------------------------|
| <i>Franklin I Aigbirhio</i>   | <ul style="list-style-type: none"> <li>• Wolfson Brain Imaging Centre, Department of Clinical Neurosciences, University of Cambridge, Addenbrooke's Hospital, Cambridge, UK</li> </ul>                                                                               |
| <i>Adam Al-Diwani</i>         | <ul style="list-style-type: none"> <li>• Oxford Autoimmune Neurology Group, Nuffield Department of Clinical Neurosciences, University of Oxford, Oxford, United Kingdom</li> <li>• Department of Psychiatry, University of Oxford, Oxford, United Kingdom</li> </ul> |
| <i>Gareth Ambler</i>          | <ul style="list-style-type: none"> <li>• Department of Statistical Science, University College London, London, UK</li> </ul>                                                                                                                                         |
| <i>Erik Årstad</i>            | <ul style="list-style-type: none"> <li>• Centre for Radiopharmaceutical Chemistry, University College London, London, UK</li> </ul>                                                                                                                                  |
| <i>Anna Barnes</i>            | <ul style="list-style-type: none"> <li>• Institute of Nuclear Medicine, University College London Hospitals, London, UK</li> </ul>                                                                                                                                   |
| <i>Ilaria Boscolo Galazzo</i> | <ul style="list-style-type: none"> <li>• Department of Computer Science, University of Verona, Verona, Italy</li> </ul>                                                                                                                                              |
| <i>Roberto Canales</i>        | <ul style="list-style-type: none"> <li>• Wolfson Brain Imaging Centre, Department of Clinical Neurosciences, University of Cambridge, Addenbrooke's Hospital, Cambridge, UK</li> </ul>                                                                               |
| <i>Sarah Chetcuti</i>         | <ul style="list-style-type: none"> <li>• Division of Anaesthesia, Department of Medicine, University of Cambridge, Addenbrooke's Hospital, Cambridge, UK</li> </ul>                                                                                                  |
| <i>Jonathan P Coles</i>       | <ul style="list-style-type: none"> <li>• Division of Anaesthesia, Department of Medicine, University of Cambridge, Addenbrooke's Hospital, Cambridge, UK</li> </ul>                                                                                                  |
| <i>Bianca De Blasi</i>        | <ul style="list-style-type: none"> <li>• Department of Medical Physics and Bioengineering, University College London, London, UK</li> </ul>                                                                                                                          |
| <i>John C Dickson</i>         | <ul style="list-style-type: none"> <li>• Institute of Nuclear Medicine, University College London Hospitals, London, UK</li> </ul>                                                                                                                                   |
| <i>John S Duncan</i>          | <ul style="list-style-type: none"> <li>• Department of Clinical and Experimental Epilepsy, UCL Queen Square Institute of Neurology, London, UK</li> <li>• MRI Unit, Chalfont Centre for Epilepsy, UK</li> </ul>                                                      |
| <i>Simon Eaglestone</i>       | <ul style="list-style-type: none"> <li>• Translational Research Office, University College London, London, UK</li> </ul>                                                                                                                                             |
| <i>Evan Edmond</i>            | <ul style="list-style-type: none"> <li>• Physiological Neuroimaging Group, Nuffield Department of Clinical Neurosciences, University of Oxford, Oxford, United Kingdom</li> </ul>                                                                                    |
| <i>Kjell Erlandsson</i>       | <ul style="list-style-type: none"> <li>• Institute of Nuclear Medicine, University College London Hospitals, London, UK</li> </ul>                                                                                                                                   |
| <i>Martin Fisher</i>          | <ul style="list-style-type: none"> <li>• Wolfson Brain Imaging Centre, Department of Clinical Neurosciences, University of Cambridge, Addenbrooke's Hospital, Cambridge, UK</li> </ul>                                                                               |

|                              |                                                                                                                                                                                                                                                                                                                                   |
|------------------------------|-----------------------------------------------------------------------------------------------------------------------------------------------------------------------------------------------------------------------------------------------------------------------------------------------------------------------------------|
| <i>Tim D Fryer</i>           | <ul style="list-style-type: none"> <li>• Wolfson Brain Imaging Centre, Department of Clinical Neurosciences, University of Cambridge, Addenbrooke's Hospital, Cambridge, UK</li> </ul>                                                                                                                                            |
| <i>Marian Galovic</i>        | <ul style="list-style-type: none"> <li>• Department of Neurology, Clinical Neuroscience Center, University Hospital Zurich, Zurich, Switzerland</li> <li>• Department of Clinical and Experimental Epilepsy, UCL Queen Square Institute of Neurology, London, UK</li> <li>• MRI Unit, Chalfont Centre for Epilepsy, UK</li> </ul> |
| <i>Thibault Gendron</i>      | <ul style="list-style-type: none"> <li>• Centre for Radiopharmaceutical Chemistry, University College London, London, UK</li> </ul>                                                                                                                                                                                               |
| <i>Ashley Groves</i>         | <ul style="list-style-type: none"> <li>• Institute of Nuclear Medicine, University College London Hospitals, London, UK</li> </ul>                                                                                                                                                                                                |
| <i>Alexander Hammers</i>     | <ul style="list-style-type: none"> <li>• King's College London and Guy's and St Thomas' PET Centre, Division of Imaging Sciences &amp; Biomedical Engineering, King's College London, London, UK</li> </ul>                                                                                                                       |
| <i>Abigail Hancock-Scott</i> | <ul style="list-style-type: none"> <li>• Wolfson Brain Imaging Centre, Department of Clinical Neurosciences, University of Cambridge, Addenbrooke's Hospital, Cambridge, UK</li> </ul>                                                                                                                                            |
| <i>Young T Hong</i>          | <ul style="list-style-type: none"> <li>• Wolfson Brain Imaging Centre, Department of Clinical Neurosciences, University of Cambridge, Addenbrooke's Hospital, Cambridge, UK</li> </ul>                                                                                                                                            |
| <i>Brian Hutton</i>          | <ul style="list-style-type: none"> <li>• Institute of Nuclear Medicine, University College London Hospitals, London, UK</li> </ul>                                                                                                                                                                                                |
| <i>Sarosh R Irani</i>        | <ul style="list-style-type: none"> <li>• Oxford Autoimmune Neurology Group, Nuffield Department of Clinical Neurosciences, University of Oxford, Oxford, United Kingdom</li> <li>• Department of Neurology, John Radcliffe Hospital, Oxford University Hospitals NHS Foundation Trust, Oxford, UK</li> </ul>                      |
| <i>Ilijas Jelcic</i>         | <ul style="list-style-type: none"> <li>• Department of Neurology, Clinical Neuroscience Center, University Hospital Zurich, Zurich, Switzerland</li> </ul>                                                                                                                                                                        |
| <i>Matthias J Koepp</i>      | <ul style="list-style-type: none"> <li>• Department of Clinical and Experimental Epilepsy, UCL Queen Square Institute of Neurology, London, UK</li> <li>• MRI Unit, Chalfont Centre for Epilepsy, UK</li> </ul>                                                                                                                   |
| <i>Roido Manavaki</i>        | <ul style="list-style-type: none"> <li>• Department of Radiology, University of Cambridge, Addenbrooke's Hospital, Cambridge, UK</li> </ul>                                                                                                                                                                                       |
| <i>Colm J McGinnity</i>      | <ul style="list-style-type: none"> <li>• King's College London and Guy's and St Thomas' PET Centre, Division of Imaging Sciences &amp; Biomedical Engineering, King's College London, London, UK</li> </ul>                                                                                                                       |
| <i>Lindsay McMurray</i>      | <ul style="list-style-type: none"> <li>• Wolfson Brain Imaging Centre, Department of Clinical Neurosciences, University of Cambridge, Addenbrooke's Hospital, Cambridge, UK</li> </ul>                                                                                                                                            |
| <i>Sarah McQuaid</i>         | <ul style="list-style-type: none"> <li>• Institute of Nuclear Medicine, University College London Hospitals, London, UK</li> </ul>                                                                                                                                                                                                |

|                             |                                                                                                                                                                                                                                                                                                             |
|-----------------------------|-------------------------------------------------------------------------------------------------------------------------------------------------------------------------------------------------------------------------------------------------------------------------------------------------------------|
| <i>Alaleh Rashidnasab</i>   | <ul style="list-style-type: none"> <li>• Institute of Nuclear Medicine, University College London Hospitals, London, UK</li> </ul>                                                                                                                                                                          |
| <i>Joseph J Russell</i>     | <ul style="list-style-type: none"> <li>• Wolfson Brain Imaging Centre, Department of Clinical Neurosciences, University of Cambridge, Addenbrooke's Hospital, Cambridge, UK</li> </ul>                                                                                                                      |
| <i>Kerstin Sander</i>       | <ul style="list-style-type: none"> <li>• Centre for Radiopharmaceutical Chemistry, University College London, London, UK</li> </ul>                                                                                                                                                                         |
| <i>Hasan Sari</i>           | <ul style="list-style-type: none"> <li>• Institute of Nuclear Medicine, University College London Hospitals, London, UK</li> <li>• Athinoula A. Martinos Center for Biomedical Imaging, Department of Radiology, Massachusetts General Hospital and Harvard Medical School, Charlestown, MA, USA</li> </ul> |
| <i>Selena Sephton</i>       | <ul style="list-style-type: none"> <li>• Wolfson Brain Imaging Centre, Department of Clinical Neurosciences, University of Cambridge, Addenbrooke's Hospital, Cambridge, UK</li> </ul>                                                                                                                      |
| <i>Daichi Sone</i>          | <ul style="list-style-type: none"> <li>• Department of Clinical and Experimental Epilepsy, UCL Queen Square Institute of Neurology, London, UK</li> <li>• MRI Unit, Chalfont Centre for Epilepsy, UK</li> </ul>                                                                                             |
| <i>Charlotte J Stagg</i>    | <ul style="list-style-type: none"> <li>• Physiological Neuroimaging Group, Nuffield Department of Clinical Neurosciences, University of Oxford, Oxford, United Kingdom</li> </ul>                                                                                                                           |
| <i>Kris Thielemans</i>      | <ul style="list-style-type: none"> <li>• Institute of Nuclear Medicine, University College London Hospitals, London, UK</li> </ul>                                                                                                                                                                          |
| <i>Benjamin A Thomas</i>    | <ul style="list-style-type: none"> <li>• Institute of Nuclear Medicine, University College London Hospitals, London, UK</li> </ul>                                                                                                                                                                          |
| <i>Francisco Torrealdea</i> | <ul style="list-style-type: none"> <li>• Department of Medical Physics and Biomedical Engineering, University College London Hospitals, London, UK</li> </ul>                                                                                                                                               |
| <i>Umesh Vivekananda</i>    | <ul style="list-style-type: none"> <li>• Department of Clinical and Experimental Epilepsy, UCL Queen Square Institute of Neurology, University College London, London, UK</li> </ul>                                                                                                                        |
| <i>Matthew C Walker</i>     | <ul style="list-style-type: none"> <li>• Department of Clinical and Experimental Epilepsy, UCL Queen Square Institute of Neurology, University College London, London, UK</li> </ul>                                                                                                                        |
